# Supplementary material
Source: PubMed Central journal article supplement (PMC3608822)
Supplement: NIHMS439536-supplement-Supp_Table_S1-S3.pdf [file NIHMS439536-supplement-Supp_Table_S1-S3.pdf]

# Malaria parasites tolerate a broad range of ionic environments and do not require host cation remodeling

## Supplemental Information

Ajay D. Pillai, Rachel Addo, Paresh Sharma, Wang Nguitragool,  
Prakash Srinivasan, and Sanjay A. Desai\*

From the Laboratory of Malaria and Vector Research, National Institute of Allergy and Infectious Diseases, National Institutes of Health, Rockville, MD 20852

\* Email: [sdesai@niaid.nih.gov](mailto:sdesai@niaid.nih.gov)  
Tel.: (301) 435-7552; Fax: (301) 402-2201

**Table S1.** Basal medium: constituents present in all media and their concentrations (mM) prior to addition of serum.

|                                                       |       |                                      |         |                             |           |
|-------------------------------------------------------|-------|--------------------------------------|---------|-----------------------------|-----------|
| Ca(NO <sub>3</sub> ) <sub>2</sub> • 4H <sub>2</sub> O | 0.42  | L-Leucine                            | 0.381   | myo-Inositol                | 0.194     |
| MgSO <sub>4</sub>                                     | 0.41  | L-Lysine • HCl                       | 0.219   | Niacinamide                 | 0.0082    |
| L-Arginine                                            | 1.15  | L-Methionine                         | 0.101   | p-Amino Benzoic Acid        | 0.0073    |
| L-Asparagine                                          | 0.378 | L-Phenylalanine                      | 0.091   | D-Pantothenic Acid, Ca salt | 0.000524  |
| L-Aspartic acid                                       | 0.150 | L-Proline                            | 0.174   | Pyridoxine • HCl            | 0.0049    |
| L-Cysteine                                            | 0.416 | L-Serine                             | 0.285   | Riboflavin                  | 0.00053   |
| L-Glutamic acid                                       | 0.136 | L-Threonine                          | 0.168   | Thiamine • HCl              | 0.0030    |
| L-Glutamine                                           | 2.05  | L-Tryptophan                         | 0.024   | Vitamin B-12                | 0.0000037 |
| Glycine                                               | 0.133 | L-Tyrosine • 2Na • 2H <sub>2</sub> O | 0.111   | D-Glucose                   | 11.1      |
| L-Histidine                                           | 0.097 | L-Valine                             | 0.171   | Glutathione, reduced        | 0.00326   |
| Hydroxy-L-proline                                     | 0.153 | D-Biotin                             | 0.00082 | HEPES, free acid            | 24.9      |
| L-Isoleucine                                          | 0.381 | Choline Chloride                     | 0.0215  | Hypoxanthine                | 0.03      |
|                                                       |       | Folic Acid                           | 0.00227 |                             |           |

**Table S2.** Constituents that differ between media and their concentrations (mM) prior to addition of serum.

|                                  | RPMI 1640 | full-K <sup>+</sup> | 4suc:6KCl | zeroK | full-K + 50 sucrose | NaCl:KGluc | 7suc:3KCl | 4suc:3KCl:3KGluc | Sucrose medium + 5.4 mM K |
|----------------------------------|-----------|---------------------|-----------|-------|---------------------|------------|-----------|------------------|---------------------------|
| NaCl                             | 102.7     | 0                   | 0         | 108   | 0                   | 64.8       | 0         | 0                | 0                         |
| KCl                              | 5.4       | 108                 | 64.8      | 0     | 108                 | 5.4        | 32.4      | 32.4             | 5.4                       |
| NaHCO <sub>3</sub>               | 28.6      | 0                   | 0         | 28.6  | 0                   | 28.6       | 0         | 0                | 28.6                      |
| KHCO <sub>3</sub>                | 0         | 28.6                | 28.6      | 0     | 28.6                | 0          | 28.6      | 28.6             | 0                         |
| Na <sub>2</sub> HPO <sub>4</sub> | 5.64      | 0                   | 0         | 5.64  | 0                   | 5.64       | 0         | 0                | 5.64                      |
| K <sub>2</sub> HPO <sub>4</sub>  | 0         | 5.64                | 5.64      | 0     | 5.64                | 0          | 5.64      | 5.64             | 0                         |
| Sucrose                          | 0         | 0                   | 84.3      | 0     | 50                  | 0          | 147.5     | 84.3             | 216                       |
| K gluconate                      | 0         | 0                   | 0         | 0     | 0                   | 64.8       | 0         | 32.4             | 0                         |

**Table S3.** Nominal concentrations of key ions, calculated osmolarities, and ionic strength of each medium. Values include contributions from basal medium, but not those resulting from addition of serum.

|                         | RPMI 1640 | full-K <sup>+</sup> | 4suc:6KCl | zeroK | full-K + 50 sucrose | NaCl:KGluc | 7suc:3KCl | 4suc:3KCl:3KGluc | Sucrose medium + 5.4 mM K |
|-------------------------|-----------|---------------------|-----------|-------|---------------------|------------|-----------|------------------|---------------------------|
| [Na <sup>+</sup> ], mM  | 142.8     | 0.2                 | 0.2       | 148.1 | 0.2                 | 104.9      | 0.2       | 0.2              | 40.1                      |
| [K <sup>+</sup> ], mM   | 5.4       | 147.9               | 104.7     | 0     | 147.9               | 70.2       | 72.3      | 104.7            | 5.4                       |
| [Cl <sup>-</sup> ], mM  | 108.3     | 108.2               | 65.0      | 108.2 | 108.2               | 70.4       | 32.6      | 32.6             | 5.6                       |
| osmolarity*, mosm       | 335.9     | 335.7               | 333.6     | 335.7 | 385.7               | 389.7      | 332.0     | 333.6            | 346.5                     |
| ionic strength**, mol/L | 163.8     | 163.7               | 120.5     | 163.7 | 163.7               | 190.7      | 88.1      | 120.5            | 61.1                      |

\* medium osmolarity was calculated assuming activity coefficients of 1 for all solutes and 100% dissociation of salts.

\*\* ionic strength, a weighted measure of the total concentration of ions in solution, is calculated according to  $I = \frac{1}{2} \sum_{i=1}^n b_i z_i^2$  where  $b$  and  $z$  are the concentration and valence of each cation or anion in the medium.

**Video S1.** Normal merozoite egress and successful invasions of two erythrocytes in RPMI 1640 medium. Note the marked deformation of the erythrocytes upon completed merozoite invasion.

**Video S2.** Defective egress and reduced invasiveness of free merozoites in 7suc:3KCl medium. Although interactions of freed merozoites and two erythrocytes are apparent, these did not lead to successful invasion, as indicated by absence of merozoite internalization or erythrocyte deformation.
